# Supplementary material for: Nomogram-Based Survival Predictions and Treatment Recommendations for Locally Advanced Esophageal Squamous Cell Carcinoma Treated with Upfront Surgery
Source: MDPI journal article supplement (doi:10.3390/cancers14225567), 2022-11-13
Supplement: s1 [file s1]

**Supplemental Table S1. TRIPOD Checklist**

| Section/Topic                | Item | Checklist Item                                                                                                                                                                                       | Page    |
|------------------------------|------|------------------------------------------------------------------------------------------------------------------------------------------------------------------------------------------------------|---------|
| <b>Title and abstract</b>    |      |                                                                                                                                                                                                      |         |
| Title                        | 1    | D;V Identify the study as developing and/or validating a multivariable prediction model, the target population, and the outcome to be predicted.                                                     | 1       |
| Abstract                     | 2    | D;V Provide a summary of objectives, study design, setting, participants, sample size, predictors, outcome, statistical analysis, results, and conclusions.                                          | 3, 4    |
| <b>Introduction</b>          |      |                                                                                                                                                                                                      |         |
| Background and objectives    | 3a   | D;V Explain the medical context (including whether diagnostic or prognostic) and rationale for developing or validating the multivariable prediction model, including references to existing models. | 5, 6    |
|                              | 3b   | D;V Specify the objectives, including whether the study describes the development or validation of the model or both.                                                                                | 5, 6    |
| <b>Methods</b>               |      |                                                                                                                                                                                                      |         |
| Source of data               | 4a   | D;V Describe the study design or source of data (e.g., randomized trial, cohort, or registry data), separately for the development and validation data sets, if applicable.                          | 6, 7, 8 |
|                              | 4b   | D;V Specify the key study dates, including start of accrual; end of accrual; and, if applicable, end of follow-up.                                                                                   | 7       |
| Participants                 | 5a   | D;V Specify key elements of the study setting (e.g., primary care, secondary care, general population) including number and location of centres.                                                     | 7       |
|                              | 5b   | D;V Describe eligibility criteria for participants.                                                                                                                                                  | 6, 7    |
|                              | 5c   | D;V Give details of treatments received, if relevant.                                                                                                                                                | 6, 8    |
| Outcome                      | 6a   | D;V Clearly define the outcome that is predicted by the prediction model, including how and when assessed.                                                                                           | 10, 11  |
|                              | 6b   | D;V Report any actions to blind assessment of the outcome to be predicted.                                                                                                                           | NA      |
| Predictors                   | 7a   | D;V Clearly define all predictors used in developing or validating the multivariable prediction model, including how and when they were measured.                                                    | 8, 9    |
|                              | 7b   | D;V Report any actions to blind assessment of predictors for the outcome and other predictors.                                                                                                       | NA      |
| Sample size                  | 8    | D;V Explain how the study size was arrived at.                                                                                                                                                       | 11      |
| Missing data                 | 9    | D;V Describe how missing data were handled (e.g., complete-case analysis, single imputation, multiple imputation) with details of any imputation method.                                             | 7       |
| Statistical analysis methods | 10a  | D Describe how predictors were handled in the analyses.                                                                                                                                              | 9       |
|                              | 10b  | D Specify type of model, all model-building procedures (including any predictor selection), and method for internal validation.                                                                      | 9       |

|                            |     |     |                                                                                                                                                                                                       |             |
|----------------------------|-----|-----|-------------------------------------------------------------------------------------------------------------------------------------------------------------------------------------------------------|-------------|
|                            | 10c | V   | For validation, describe how the predictions were calculated.                                                                                                                                         | 10          |
|                            | 10d | D;V | Specify all measures used to assess model performance and, if relevant, to compare multiple models.                                                                                                   | 10          |
|                            | 10e | V   | Describe any model updating (e.g., recalibration) arising from the validation, if done.                                                                                                               | NA          |
| Risk groups                | 11  | D;V | Provide details on how risk groups were created, if done.                                                                                                                                             | 13          |
| Development vs. validation | 12  | V   | For validation, identify any differences from the development data in setting, eligibility criteria, outcome, and predictors.                                                                         | 7, 8, 10-12 |
| <b>Results</b>             |     |     |                                                                                                                                                                                                       |             |
|                            | 13a | D;V | Describe the flow of participants through the study, including the number of participants with and without the outcome and, if applicable, a summary of the follow-up time. A diagram may be helpful. | 11          |
| Participants               | 13b | D;V | Describe the characteristics of the participants (basic demographics, clinical features, available predictors), including the number of participants with missing data for predictors and outcome.    | 11, 12      |
|                            | 13c | V   | For validation, show a comparison with the development data of the distribution of important variables (demographics, predictors and outcome).                                                        | 12, Table 1 |
| Model development          | 14a | D   | Specify the number of participants and outcome events in each analysis.                                                                                                                               | 11          |
|                            | 14b | D   | If done, report the unadjusted association between each candidate predictor and outcome.                                                                                                              | NA          |
| Model specification        | 15a | D   | Present the full prediction model to allow predictions for individuals (i.e., all regression coefficients, and model intercept or baseline survival at a given time point).                           | 14          |
|                            | 15b | D   | Explain how to use the prediction model.                                                                                                                                                              | 12          |
| Model performance          | 16  | D;V | Report performance measures (with CIs) for the prediction model.                                                                                                                                      | 13          |
| Model-updating             | 17  | V   | If done, report the results from any model updating (i.e., model specification, model performance).                                                                                                   | NA          |
| <b>Discussion</b>          |     |     |                                                                                                                                                                                                       |             |
| Limitations                | 18  | D;V | Discuss any limitations of the study (such as nonrepresentative sample, few events per predictor, missing data).                                                                                      | 18          |
|                            | 19a | V   | For validation, discuss the results with reference to performance in the development data, and any other validation data.                                                                             | 15-17       |
| Interpretation             | 19b | D;V | Give an overall interpretation of the results, considering objectives, limitations, results from similar studies, and other relevant evidence.                                                        | 19          |
| Implications               | 20  | D;V | Discuss the potential clinical use of the model and implications for future research.                                                                                                                 | 16-18       |
| <b>Other information</b>   |     |     |                                                                                                                                                                                                       |             |

|                           |    |     |                                                                                                                               |    |
|---------------------------|----|-----|-------------------------------------------------------------------------------------------------------------------------------|----|
| Supplementary information | 21 | D;V | Provide information about the availability of supplementary resources, such as study protocol, Web calculator, and data sets. | 12 |
| Funding                   | 22 | D;V | Give the source of funding and the role of the funders for the present study.                                                 | 2  |

---

\*Items relevant only to the development of a prediction model are denoted by D, items relating solely to a validation of a prediction model are denoted by V, and items relating to both are denoted D;V. We recommend using the TRIPOD Checklist in conjunction with the TRIPOD Explanation and Elaboration document.

**Supplemental Table S2.** Nomogram score formula

| Variable                                                                                                                   | Variable score |
|----------------------------------------------------------------------------------------------------------------------------|----------------|
| Gender                                                                                                                     |                |
| Female                                                                                                                     | 0              |
| Male                                                                                                                       | 22.5           |
| Pathological T stage                                                                                                       |                |
| T1b                                                                                                                        | 0              |
| T2                                                                                                                         | 48.3           |
| T3                                                                                                                         | 68.9           |
| T4                                                                                                                         | 100            |
| Pathological N stage                                                                                                       |                |
| N0                                                                                                                         | 0              |
| N1                                                                                                                         | 45.2           |
| N2                                                                                                                         | 75.2           |
| N3                                                                                                                         | 93.5           |
| Tumor differentiation                                                                                                      |                |
| Good                                                                                                                       | 0              |
| Moderate                                                                                                                   | 13.9           |
| Poor                                                                                                                       | 20.1           |
| Surgical margin                                                                                                            |                |
| Negative                                                                                                                   | 0              |
| Positive                                                                                                                   | 18.0           |
| Lymphovascular invasion                                                                                                    |                |
| No                                                                                                                         | 0              |
| Yes                                                                                                                        | 4.7            |
| Number of lymph node resection                                                                                             |                |
| $\geq 15$                                                                                                                  | 0              |
| $< 15$                                                                                                                     | 20.1           |
| Adjuvant therapy                                                                                                           |                |
| Chemoradiotherapy                                                                                                          | 0              |
| Chemotherapy                                                                                                               | 14.8           |
| No                                                                                                                         | 31.7           |
| Linear predictor = $0.018 \times \text{points} - 3.03$                                                                     |                |
| 5-year OS rate = $1.65e-07 \times \text{points}^3 - 8.56e-05 \times \text{points}^2 + 0.0086 \times \text{points} + 0.649$ |                |

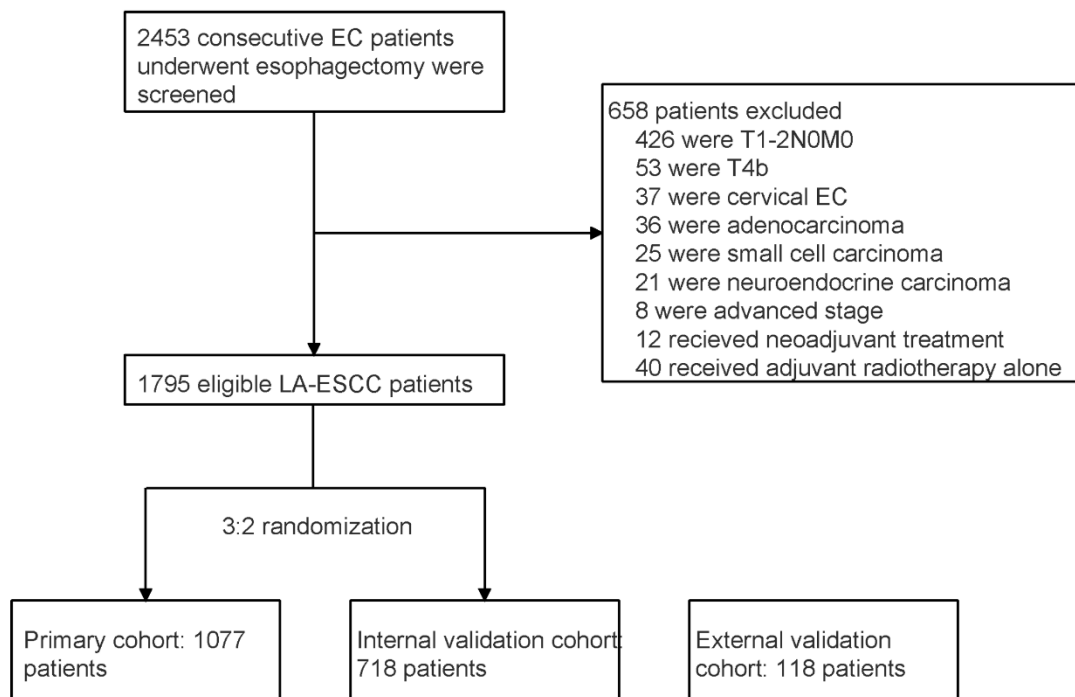

**Supplemental Figure S1.** Flow chart for patient inclusion. EC, esophageal carcinoma; LA-ESCC, locally advanced esophageal squamous cell carcinoma.

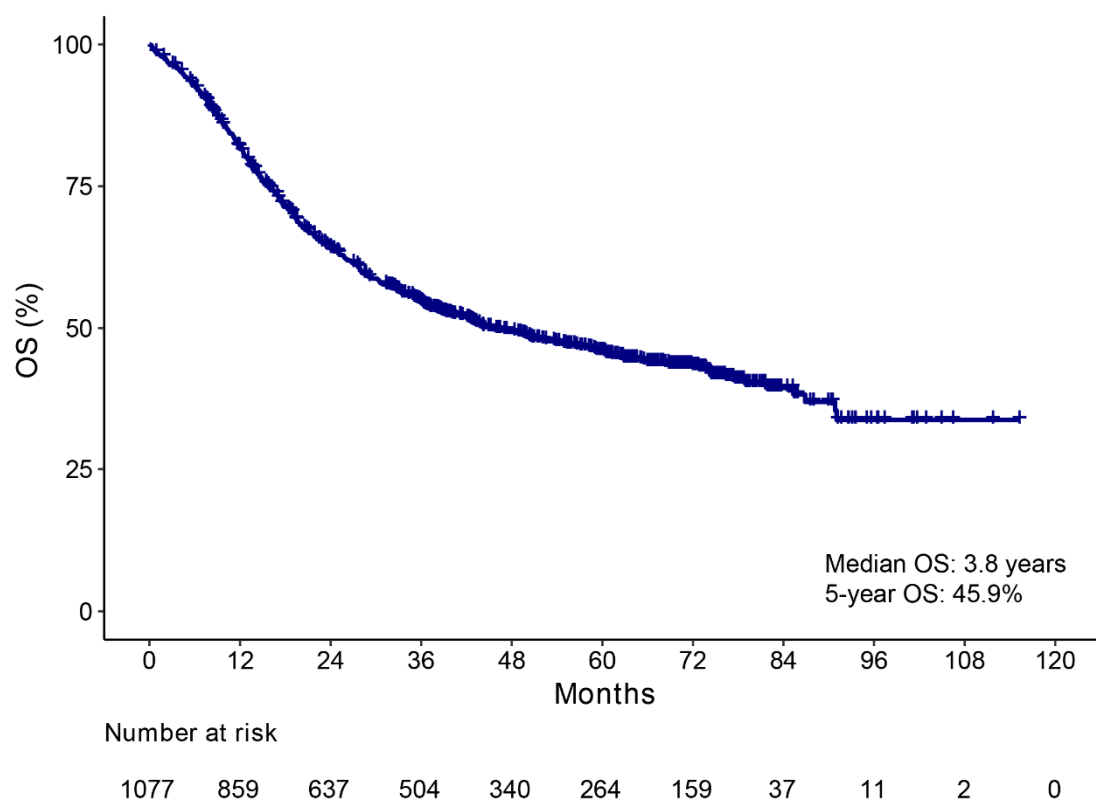

**Supplemental Figure S2.** Kaplan-Meier survival curve of the primary cohort. OS, overall survival.
